# Supplementary material
Source: PubMed Central journal article supplement (PMC4106362)
Supplement: NIHMS550439-supplement-1.pdf [file NIHMS550439-supplement-1.pdf]

## Supplementary Figure 1

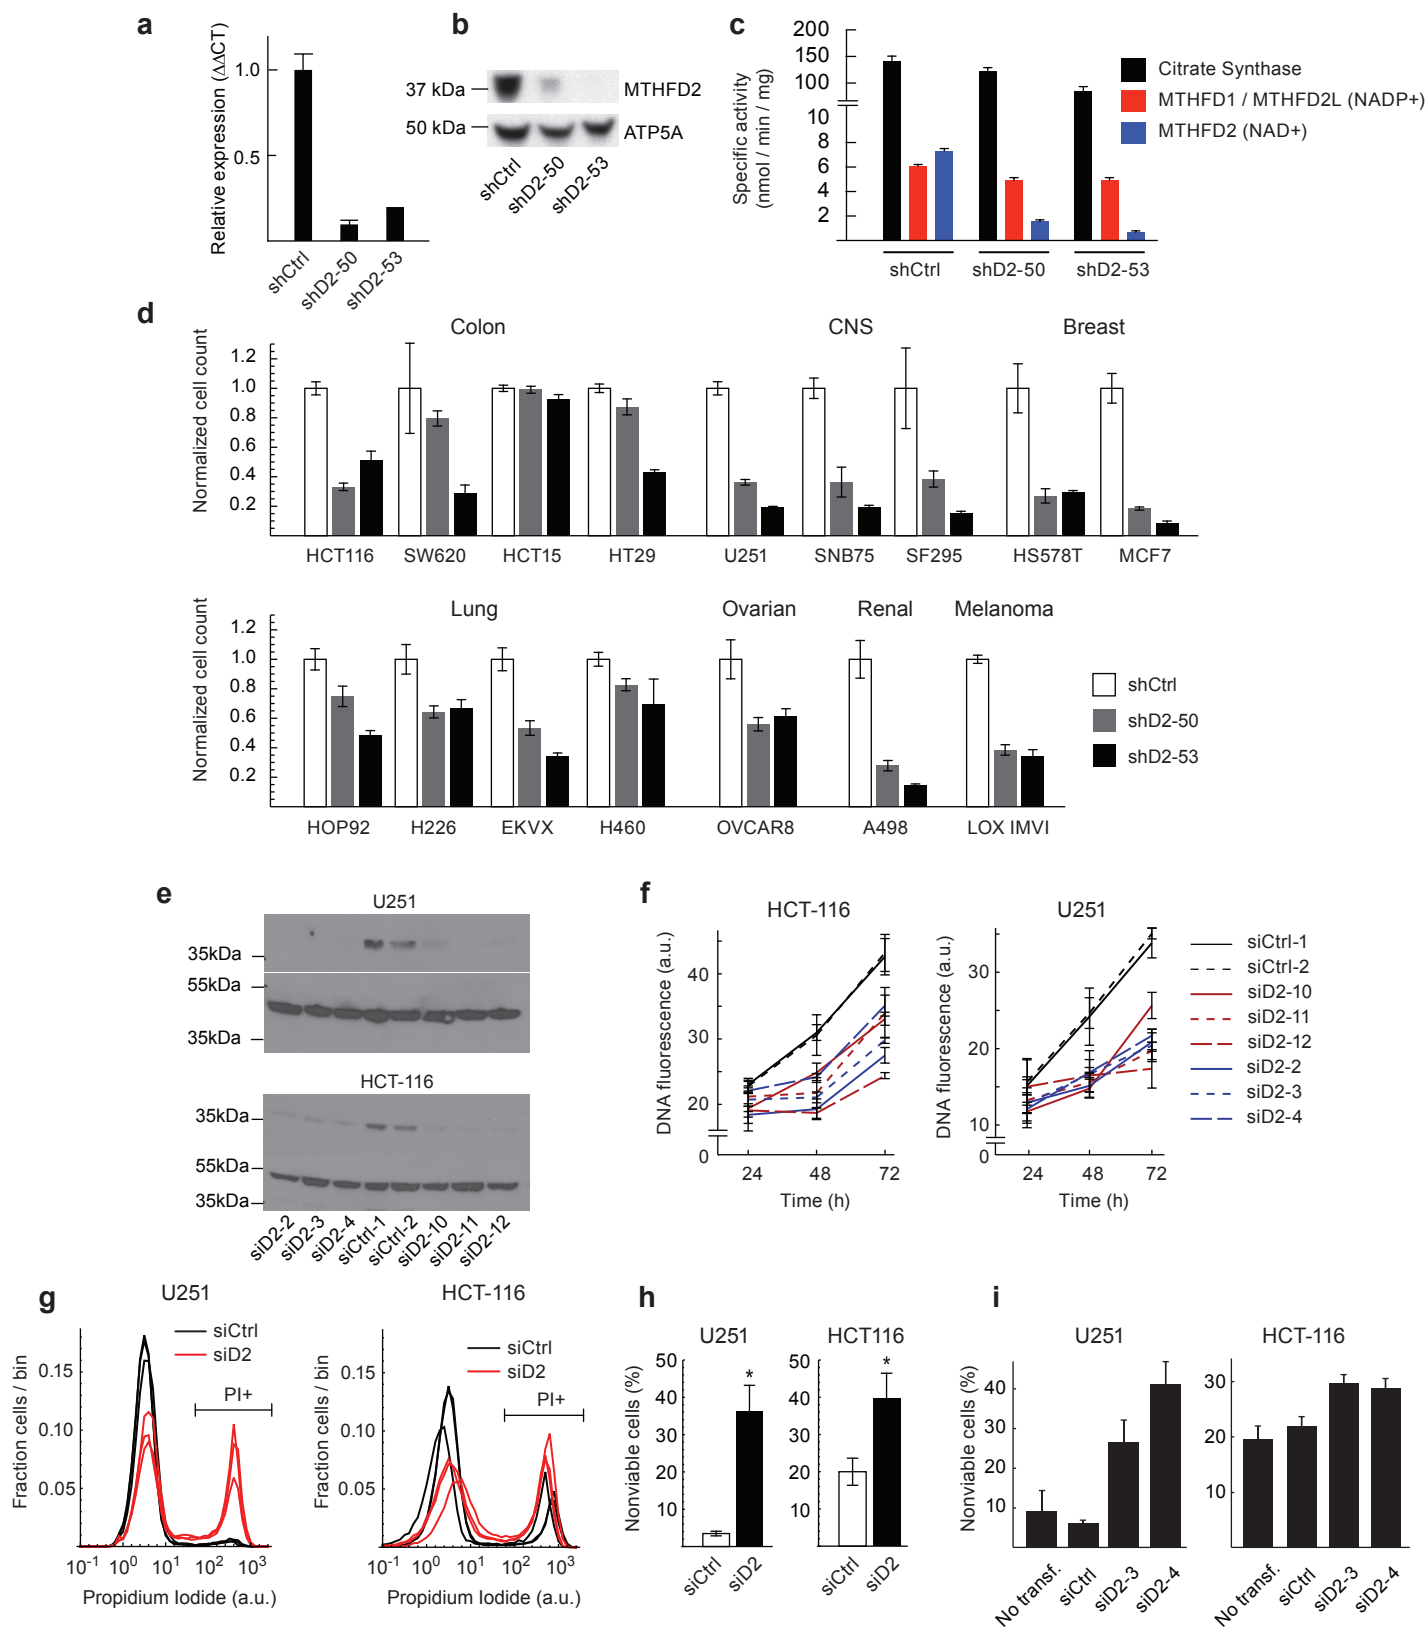

**RNA interference targeting MTHFD2 causes cancer cell death.** (a) RT-PCR of MTHFD2 mRNA following shRNA against MTHFD2 (shD2-50 and shD2-53 hairpins) or control shRNA (shCtrl) at day 7 post-transfection, expressed as  $\Delta\Delta Ct$  values relative to HPRT mRNA (control) and shCtrl values. Error bars denote standard deviation ( $n = 3$ ). (b) Western blot of MTHFD2 and ATP5A (loading control) in knockdown cells, as in (a). (c) Enzymatic assay of methylene-THF dehydrogenase activity in knockdown cells, as in (a). Red bars, NADP+ dependent dehydrogenase (MTHFD1/MTHFD2L); blue bars, NAD+ dependent dehydrogenase (MTHFD2); black bars, citrate synthase assay (mitochondrial control). Error bars denote standard deviation ( $n = 3$ ). (d) Cell proliferation in 16 cell knockdown cell lines as in (a), expressed as cell counts at day 7 post-transfection, normalized to shCtrl values. Error bars denote standard deviation ( $n = 8$ ). (e) Western blot of MTHFD2 and ACTB (control) at 48h after transient transfection with siRNA oligos targeting MTHFD2 (siD2-10,11,12,2,3,4) or control oligos (siCtrl-1, siCtrl-2). (f) Cell proliferation (DNA content) following transient transfection, as in (e). Error bars denote standard deviation ( $n = 3$ ). (g) Propidium iodide (PI) cell viability assay using flow cytometry at 48h post siRNA transfection, normalized to area-under-curve = 1. PI+ (nonviable) cells were defined as PI > 50, indicated by gate. siD2, pool of oligos siD2-10,11,12. (h) Quantification of data in (g), error bars denote standard deviation ( $n = 3$ ). \*  $P < 0.02$ , two-tailed Student's t-test with Welch's correction for unequal variances. (i) PI viability assay as in (g,h) for individual siRNA oligos, control siRNAs, and no transfection. Error bars denote standard deviation ( $n = 3$ ).

## Supplementary Figure 2

ATGGCTGCGACTTCTCTAATGTCTGCTTTGGCTGCCCGGCTGCTGCAGCCCGCGCAC  
AGCTGCTCCCTTCGCTTCGCCCTTCCACCTCGCGGCAGTTCGAAATGAAGCTGTT  
GTCATTTCTGGAAGGAAACTGGCCCAGCAGATCAAGCAGGAAGTGCGGCAGGAGGTA  
GAAGAGTGGGTGGCCTCAGGCAACAAACGGCCACACCTGAGTGTGATCCTGGTTG**GC**  
**GAGAATCCTGCAAGTCA**CTCCTATGTCTCAACAAAACCAGGGCAGCTGCAGTTGTG  
GGAATCAACAGTGAGACAATTATGAAACCAGCTTCAATTTTCAGAGGAAGAATTGTTG  
AATTTAATCAATAAACTGAATAATGATGATAATGTAGATGGCCTCCTTGTTTCAGTTG  
CCTCTTCCAGAGCATATTGATGAGAGAAGGATCTGCAATGCTGTTTCTCCAGACAAG  
GATGTTGATGGCTTTCATGTAATTAATGTA**GGACGAATGTGTTTGGATCAGTATTCC**  
**ATGTTA**CCGGCTACTCCATGGGGTGTGTGGGAAATAATCAAGCGAACTGGCATTCCA  
ACCCTAGGGAAGAATGTGGTTGTGGCTGGAAGGTCAAAAAACGTTGGAATGCCCAT  
GCAATGTTACTGCACACAGATGGGGCGCATGAACGTCCCGGAGGTGATGCCACT**GTT**  
**ACAATATCTCATCGATA**TACTCCCAAAGA**GCAGTTGAAGAAACATACAAT**TCTTGCA  
GATATTGTAATATCTGCTGCAGGTATTCCAAATCTGATCACAGCAGATATGATCAAG  
**GAAGGAGCAGCAGTCATT**GATGTGG**GAATAAATAGAGTTCACGA**TCCTGTAACTGCC  
AAACCCAAGTTGGTTGGAGATGTGGATTTTGAAGGAGTCAGACAAAAGCTGGGTAT  
ATCACTCCAGTTCCTGGAGGTGTTGGCCCCATGACAGTGGCAATGCTAATGAAGAAT  
ACCATATTGCTGCAAAAAGGTGCTGAGGCTTGAAGAGCGAGAAGTGCTGAAGTCT  
AAAGAGCTTGGGGTAGCCACTAATTAA

shD2-50      **CGAATGTGTTTGGATCAGTAT**

shD2-53      **GCAGTTGAAGAAACATACAAT**

siD2-2        **GGAAGGAGCAGCAGTCATT**

siD2-3        **GGATCAGTATTCCATGTTA**

siD2-4        **GTTACAATATCTCATCGAT**

siD2-10      **GAATAAATAGAGTTCACGA**

siD2-11      **GGACGAATGTGTTTGGATC**

siD2-12      **GCGAGAATCCTGCAAGTCA**

**Alignment of RNA interference sequences to the MTHFD2 cDNA.** cDNA sequence for the MTHFD2 mRNA, Refseq accession no. NM\_006636.3 with siRNA and shRNA target sequences indicated.

## Supplementary Figure 3

**a**

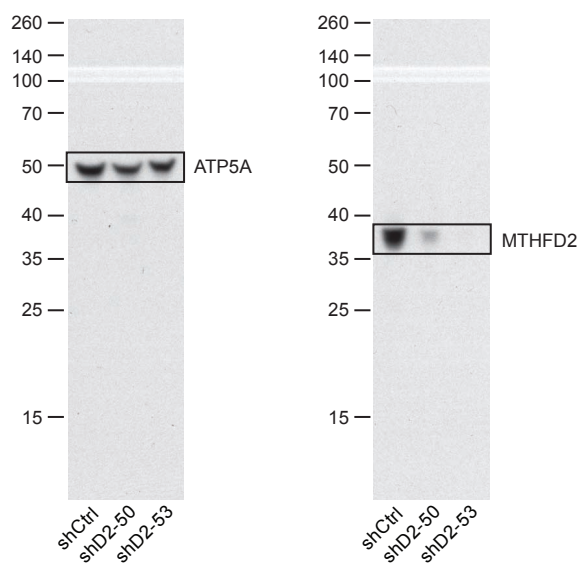

**b**

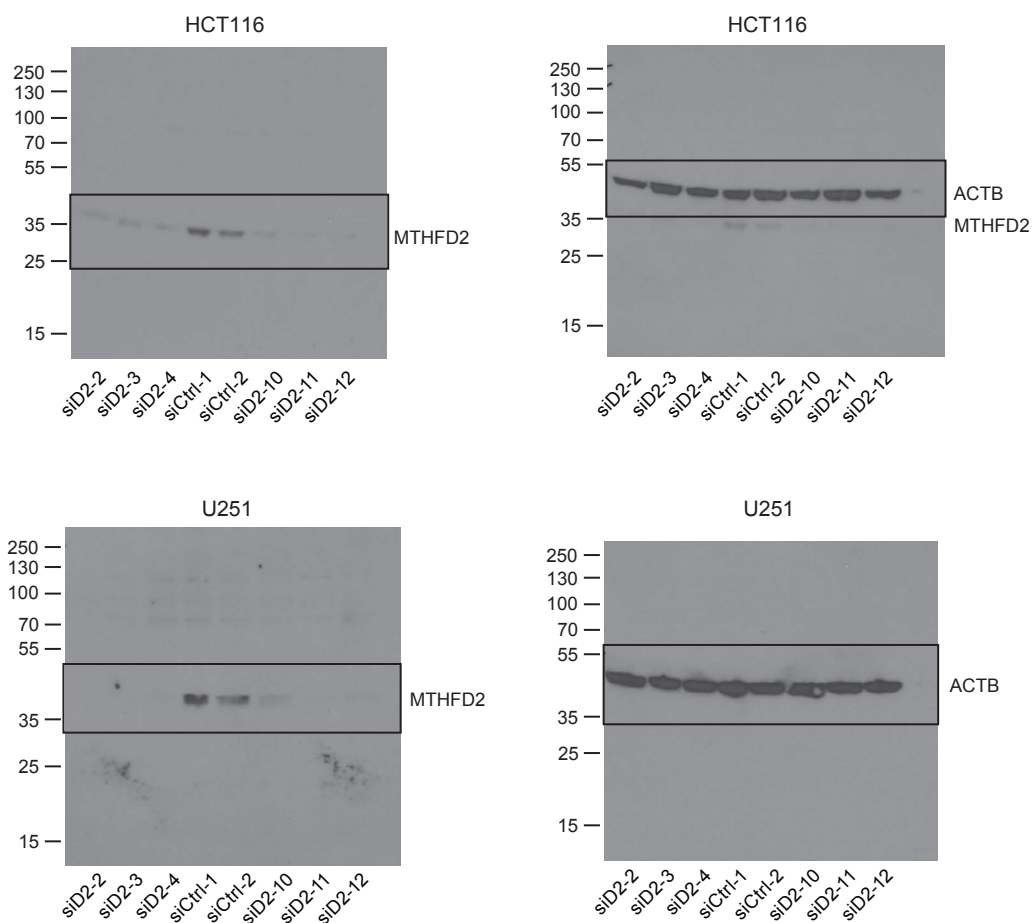

**Full-size images for western blot analyses.** (a) Full-size western blots corresponding to Supplementary Figure 1b. A single gel was used for all lanes, samples were loaded in duplicate wells as indicated, and membrane was cut after transfer and separately probed with antibodies against MTHFD2 and ATP5A (b) Full-size western blots corresponding to Supplementary Figure 1e. Upper two images are from same gel probed first with antibody against MTHFD2 (left), then with antibody against ACTB (right), and similarly for lower two images. Boxes indicate sections displayed in Supplementary Figure 1.



## Supplementary Figure 4

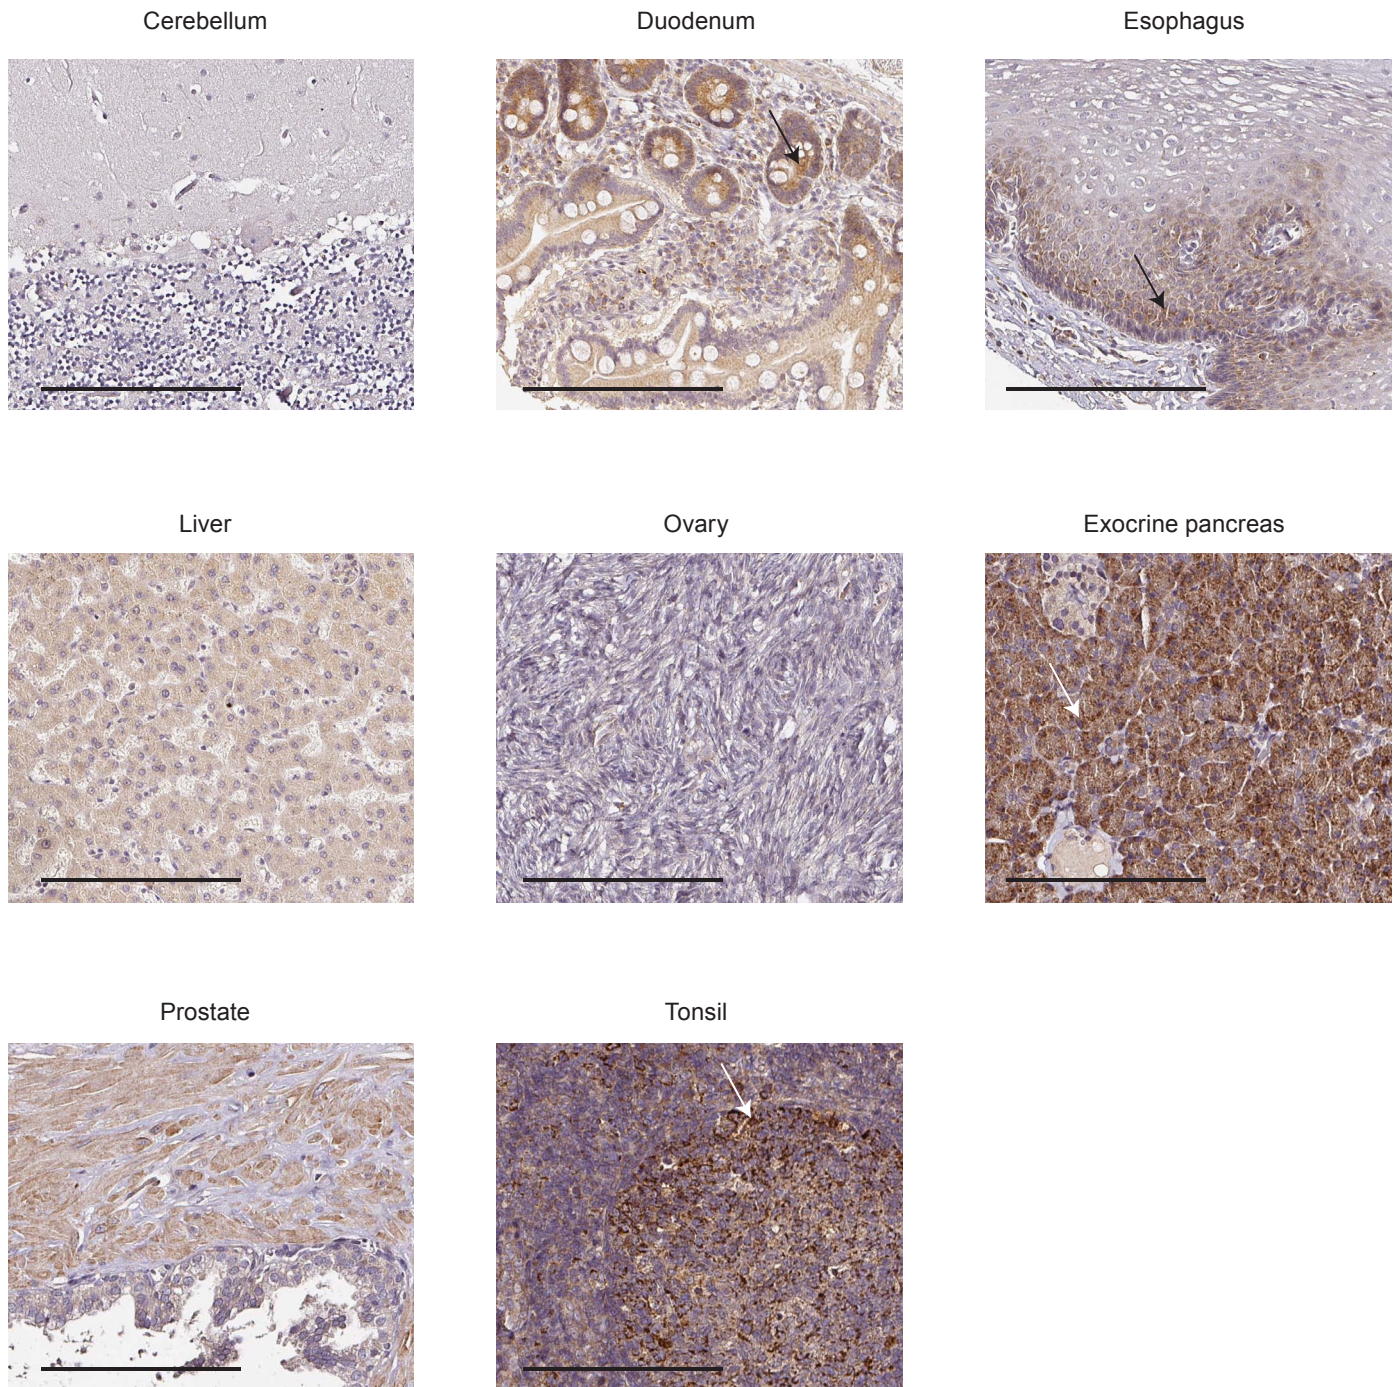

**MTHFD2 protein expression in normal human tissues.** Immunohistochemistry staining for the MTHFD2 protein in samples from eight normal human tissues. Staining is observed in exocrine pancreas, in primarily germinal centres of tonsil, in crypts of the duodenum and in suprabasal layers of the squamous epithelium of esophagus (arrows). Scale bars represent 200  $\mu$ m.

Supplementary Figure 5

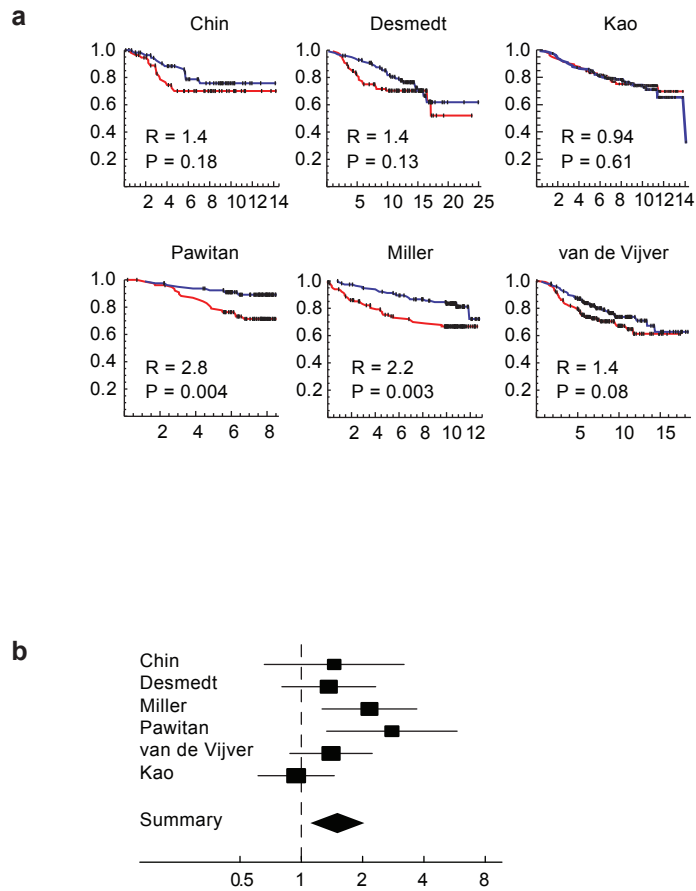

**Association of MTHFD2 with survival in breast cancer patients. (a)** Kaplan-Meier survival curves for six large cohorts of breast cancer patients, stratified by above-median (red) or below-median (blue) expression of MTHFD2. Black bars indicate censored events. R, Cox proportional hazard ratios; P, log rank test P-values. **(b)** Meta-analysis of the six cohorts in (a) by the method of DerSimonian and Laird. Solid lines denote 95% confidence intervals; boxes denote the relative influence of each study over the results (inverse squared standard error). Diamond marks the overall 95% confidence interval.

| <b>Tissue / cell type</b>       | <b>Classification</b> |
|---------------------------------|-----------------------|
| <b>AdrenalCortex</b>            | Normal/postmitotic    |
| <b>Adrenalgland</b>             | Normal/postmitotic    |
| <b>Amygdala</b>                 | Normal/postmitotic    |
| <b>Appendix</b>                 | Normal/postmitotic    |
| <b>AtrioventricularNode</b>     | Normal/postmitotic    |
| <b>Caudatenucleus</b>           | Normal/postmitotic    |
| <b>Cerebellum</b>               | Normal/postmitotic    |
| <b>CerebellumPeduncles</b>      | Normal/postmitotic    |
| <b>CiliaryGanglion</b>          | Normal/postmitotic    |
| <b>CingulateCortex</b>          | Normal/postmitotic    |
| <b>DorsalRootGanglion</b>       | Normal/postmitotic    |
| <b>GlobusPallidus</b>           | Normal/postmitotic    |
| <b>Heart</b>                    | Normal/postmitotic    |
| <b>Hypothalamus</b>             | Normal/postmitotic    |
| <b>Kidney</b>                   | Normal/postmitotic    |
| <b>Liver</b>                    | Normal/postmitotic    |
| <b>Lung</b>                     | Normal/postmitotic    |
| <b>MedullaOblongata</b>         | Normal/postmitotic    |
| <b>OccipitalLobe</b>            | Normal/postmitotic    |
| <b>OlfactoryBulb</b>            | Normal/postmitotic    |
| <b>Pancreas</b>                 | Normal/postmitotic    |
| <b>PancreaticIslet</b>          | Normal/postmitotic    |
| <b>ParietalLobe</b>             | Normal/postmitotic    |
| <b>Pituitary</b>                | Normal/postmitotic    |
| <b>Pons</b>                     | Normal/postmitotic    |
| <b>PrefrontalCortex</b>         | Normal/postmitotic    |
| <b>Salivarygland</b>            | Normal/postmitotic    |
| <b>SkeletalMuscle</b>           | Normal/postmitotic    |
| <b>Spinalcord</b>               | Normal/postmitotic    |
| <b>SubthalamicNucleus</b>       | Normal/postmitotic    |
| <b>SuperiorCervicalGanglion</b> | Normal/postmitotic    |
| <b>TemporalLobe</b>             | Normal/postmitotic    |
| <b>TestisSeminiferousTubule</b> | Normal/postmitotic    |
| <b>Thalamus</b>                 | Normal/postmitotic    |
| <b>Thyroid</b>                  | Normal/postmitotic    |
| <b>Tongue</b>                   | Normal/postmitotic    |
| <b>Trachea</b>                  | Normal/postmitotic    |
| <b>TrigeminalGanglion</b>       | Normal/postmitotic    |
| <b>Uterus</b>                   | Normal/postmitotic    |
| <b>UterusCorpus</b>             | Normal/postmitotic    |
| <b>Wholebrain</b>               | Normal/postmitotic    |
| <b>pineal_day</b>               | Normal/postmitotic    |
| <b>pineal_day</b>               | Normal/postmitotic    |
| <b>pineal_day</b>               | Normal/postmitotic    |

|                                  |                      |
|----------------------------------|----------------------|
| pineal_night                     | Normal/postmitotic   |
| pineal_night                     | Normal/postmitotic   |
| retina                           | Normal/postmitotic   |
| retina                           | Normal/postmitotic   |
| BDCA4+_DendriticCells            | Normal/proliferating |
| Bonemarrow                       | Normal/proliferating |
| CD105+_Endothelial               | Normal/proliferating |
| CD14+_Monocytes                  | Normal/proliferating |
| CD19+_BCells(neg._sel.)          | Normal/proliferating |
| CD33+_Myeloid                    | Normal/proliferating |
| CD34+                            | Normal/proliferating |
| CD4+_Tcells                      | Normal/proliferating |
| CD56+_NKCells                    | Normal/proliferating |
| CD71+_EarlyErythroid             | Normal/proliferating |
| CD8+_Tcells                      | Normal/proliferating |
| Lymphnode                        | Normal/proliferating |
| Ovary                            | Normal/proliferating |
| Placenta                         | Normal/proliferating |
| Prostate                         | Normal/proliferating |
| Skin                             | Normal/proliferating |
| Testis                           | Normal/proliferating |
| TestisGermCell                   | Normal/proliferating |
| TestisInterstitial               | Normal/proliferating |
| TestisLeydigCell                 | Normal/proliferating |
| Thymus                           | Normal/proliferating |
| Tonsil                           | Normal/proliferating |
| WholeBlood                       | Normal/proliferating |
| colon                            | Normal/proliferating |
| small_intestine                  | Normal/proliferating |
| 721_B_lymphoblasts               | Transformed          |
| Colorectaladenocarcinoma         | Transformed          |
| Leukemia_chronicMyelogenousK-562 | Transformed          |
| Leukemia_promyelocytic-HL-60     | Transformed          |
| Leukemialymphoblastic(MOLT-4)    | Transformed          |
| Lymphoma_burkitts(Daudi)         | Transformed          |
| Lymphoma_burkitts(Raji)          | Transformed          |

**Supplementary Table 1. Classification of human tissue and cell samples.**
